# Supplementary material
Source: PubMed Central journal article supplement (PMC1312427)

No Stress

Stress

Recovery

GABA<sub>B</sub> →

GAD-65 →

BDNF →

Actin →

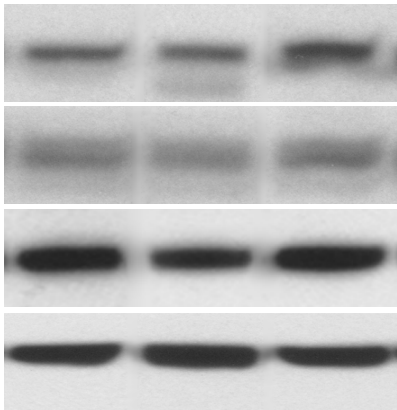

Supplement: pnas_0509232102_1.pdf [file pnas_0509232102_1.pdf]
